# Supplementary material for: Interaction-determined extraction capacity between rare earth ions and extractants: taking lanthanum and lutetium as models through theoretical calculations
Source: Royal Society of Chemistry journal article supplement (doi:10.1039/d2qi01261h), 2022-01-01
Supplement: d2qi01261h1.pdf [file d2qi01261h1.pdf]

Supporting Information available for

**Interaction-determined extraction capacity between rare earth ions and extractants:  
taking lanthanum and lutetium as models through theoretical calculations**

Haifeng Zheng<sup>a</sup>, Yanling Li<sup>a,b</sup>, Xuyi Zhang<sup>c,d</sup>, Jinglu Han<sup>a,b</sup>, Songsong Li<sup>a,b</sup>, Guolong Wu<sup>a,b</sup>, Qingshi Liu<sup>a,b</sup>, Xiaojuan Liu<sup>a,b,d\*</sup>, Wuping Liao<sup>a,b,d\*</sup>

<sup>a</sup> *State Key Laboratory of Rare Earth Resources Utilization, Changchun Institute of Applied Chemistry, Chinese Academy of Sciences, Changchun, Jilin 130022, People's Republic of China. Email: lxjuan@ciac.ac.cn, (X. Liu) wpliao@ciac.ac.cn (W. Liao)*

<sup>b</sup> *University of Science and Technology of China, Hefei 230026, China.*

<sup>c</sup> *School of Chemistry and Chemical Engineering, Nanchang University, Nanchang, 330031 (P. R. China).*

<sup>d</sup> *Ganjiang Innovation Academy, Chinese Academy of Sciences, Ganzhou 341000, China.*

## Table of Contents

|                                                                                                                                                                                                                                                                                                                                                                                                                                                                                                                                                                                                                                         |    |
|-----------------------------------------------------------------------------------------------------------------------------------------------------------------------------------------------------------------------------------------------------------------------------------------------------------------------------------------------------------------------------------------------------------------------------------------------------------------------------------------------------------------------------------------------------------------------------------------------------------------------------------------|----|
| 1. Fig. S1. a) The atoms in molecules graphs of the simplified structures of $\text{La} \cdot 3[\text{C272}]_2$ and $\text{Lu} \cdot 3[\text{C272}]_2$ . Purple, yellow and green dots denote bond critical point (BCP), ring critical point (RCP) and cage ring critical point (CCP), respectively. b) The Laplacian distribution sectional diagram of one of the octatomic rings. Green dashed lines represent areas of charge concentration ( $\nabla^2\rho(r) < 0$ ) while solid gray lines show areas of charge depletion ( $\nabla^2\rho(r) > 0$ ). The solid magenta lines connecting the atomic nuclei are the bond paths. .... | 3  |
| 2. Fig. S2. Isosurface map of $\text{IRI} = 1.2$ and the scatter map between $\text{IRI}$ and $\text{sign}(\lambda_2)\rho$ of simplified structures. ....                                                                                                                                                                                                                                                                                                                                                                                                                                                                               | 4  |
| 3. Fig. S3. a) ESP mapped van der Waals surface (isovalue = $\pm 0.001$ ) of simplified structures. The orange and cyan spheres are represented positive and negative, respectively. The unit is in kcal/mol. b) Area percent in each ESP range on the vdW surface of Lu-complexed. ....                                                                                                                                                                                                                                                                                                                                                | 5  |
| 4. Fig. S4. The five major NOCV pairs of complexes structures. ....                                                                                                                                                                                                                                                                                                                                                                                                                                                                                                                                                                     | 6  |
| 5. Table S1. The bond length and Mayer bond order (MBO) between Ln-O in four extractant complexes at the level of BP86/ECP28MWB. ....                                                                                                                                                                                                                                                                                                                                                                                                                                                                                                   | 8  |
| 6. Table S2. Topological properties of the complex structures between La/Lu and six coordination oxygen atoms, including density of all electrons $\rho(r)$ , Laplacian of electron density $\nabla^2\rho(r)$ . ....                                                                                                                                                                                                                                                                                                                                                                                                                    | 9  |
| 7. Table S3 The values of ESP nearby three types atoms of simplified structures. ....                                                                                                                                                                                                                                                                                                                                                                                                                                                                                                                                                   | 10 |
| 8. Table S4. The Gibbs free energy of complexation structures between Ln (Ln = La/Lu) and four organophosphoric extractants in three forms ( $\text{Ln}^{3+}$ , $(\text{Ln} \cdot 8\text{H}_2\text{O})^{3+}$ and $(\text{Ln} \cdot 9\text{H}_2\text{O})^{3+}$ ). ....                                                                                                                                                                                                                                                                                                                                                                   | 11 |
| 9. Table S5. The contribution of various types of shells of complexes structures. ....                                                                                                                                                                                                                                                                                                                                                                                                                                                                                                                                                  | 12 |
| 10. Table S6. The atoms contribution of complexes structures. ....                                                                                                                                                                                                                                                                                                                                                                                                                                                                                                                                                                      | 14 |

1. Fig. S1. a) The atoms in molecules graphs of the simplified structures of  $\text{La}\cdot 3[\text{C272}]_2$  and  $\text{Lu}\cdot 3[\text{C272}]_2$ . Purple, yellow and green dots denote bond critical point (BCP), ring critical point (RCP) and cage ring critical point (CCP), respectively. b) The Laplacian distribution sectional diagram of one of the octatomic rings. Green dashed lines represent areas of charge concentration ( $\nabla^2\rho(\mathbf{r}) < 0$ ) while solid gray lines show areas of charge depletion ( $\nabla^2\rho(\mathbf{r}) > 0$ ). The solid magenta lines connecting the atomic nuclei are the bond paths.

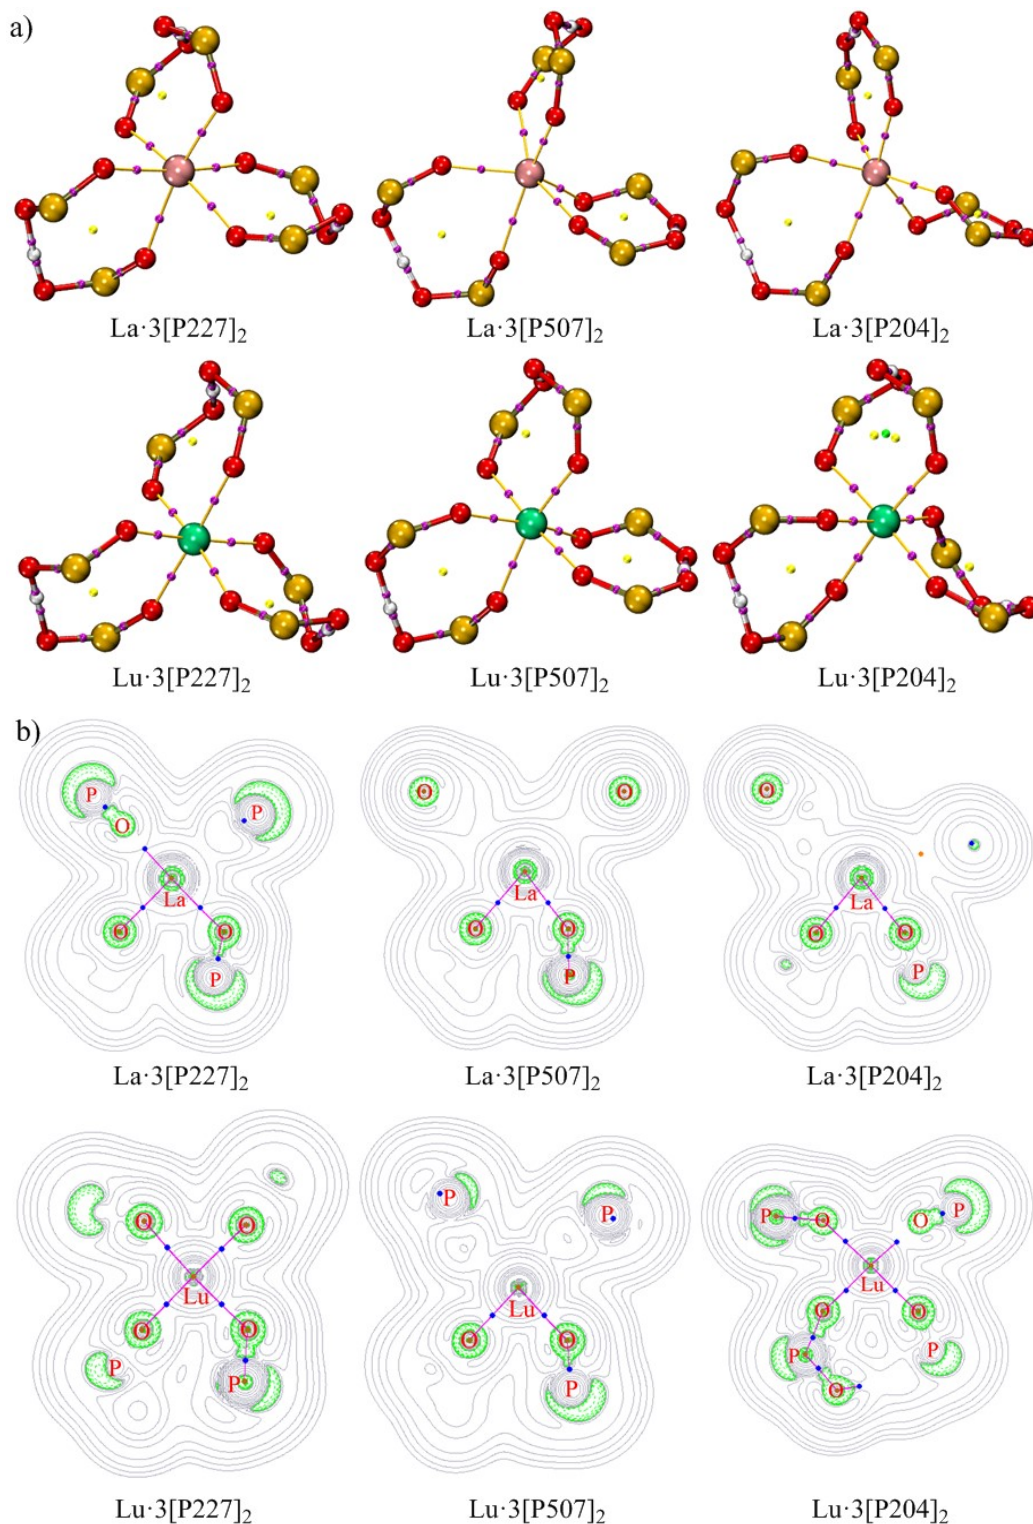

2. Fig. S2. Isosurface map of IRI = 1.2 and the scatter map between IRI and  $\text{sign}(\lambda_2)\rho$  of simplified structures.

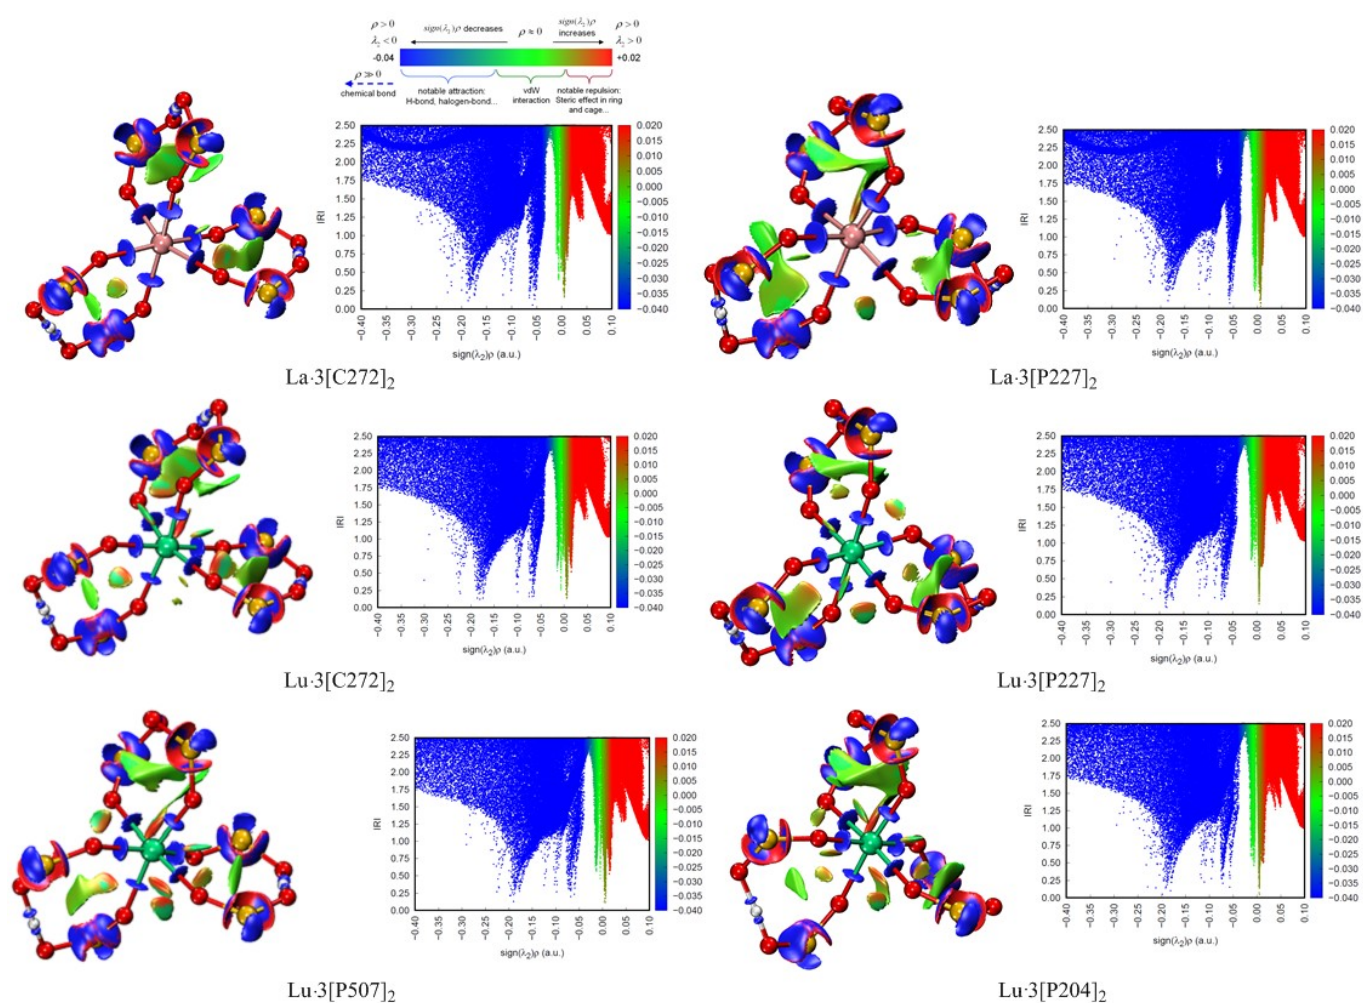

3. Fig. S3. a) ESP mapped van der Waals surface (isovalue =  $\pm 0.001$ ) of simplified structures. The orange and cyan spheres are represented positive and negative, respectively. The unit is in kcal/mol. b) Area percent in each ESP range on the vdW surface of Lu-complexed.

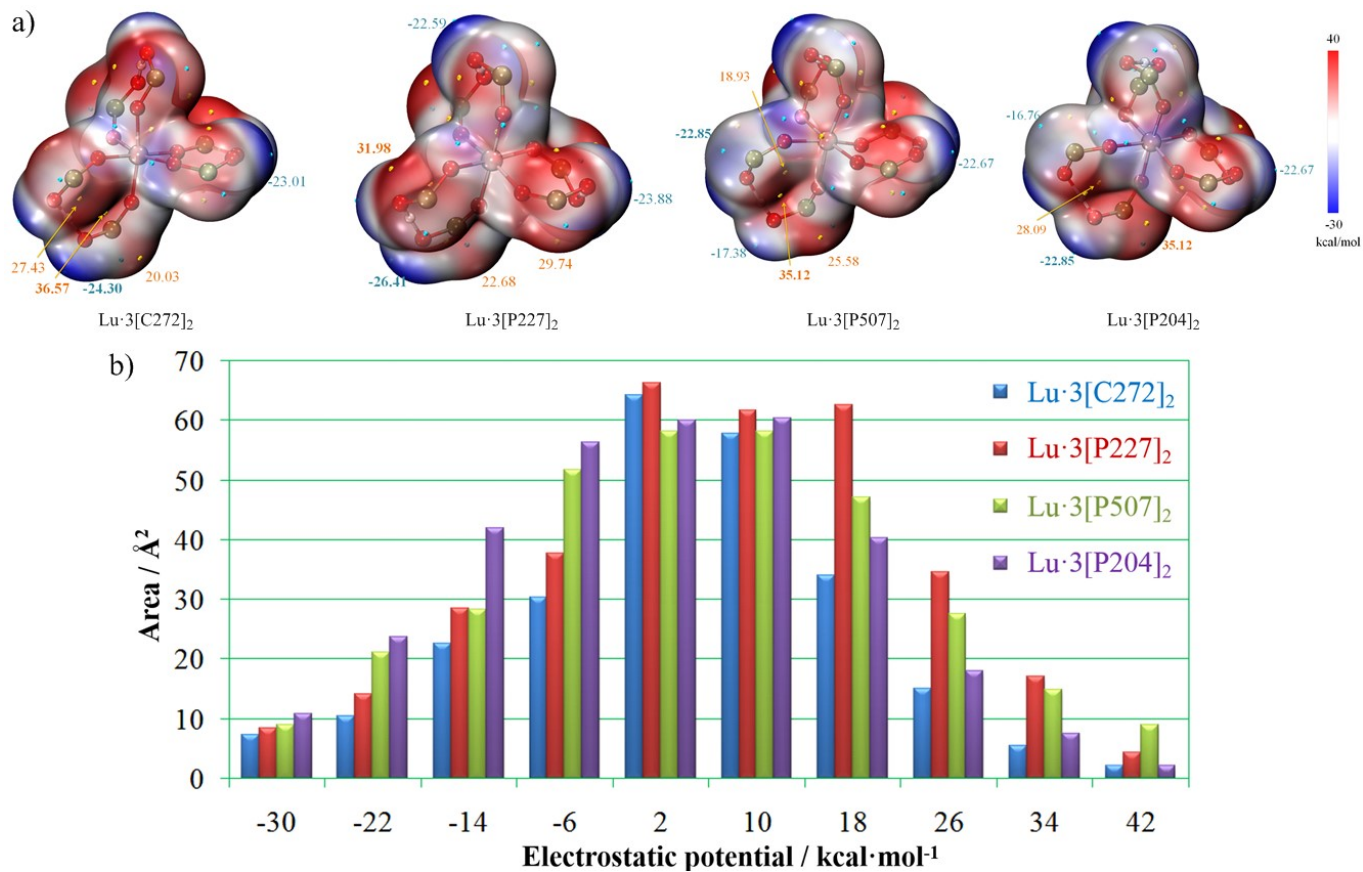

4. Fig. S4. The five major NOCV pairs of complexed structures.

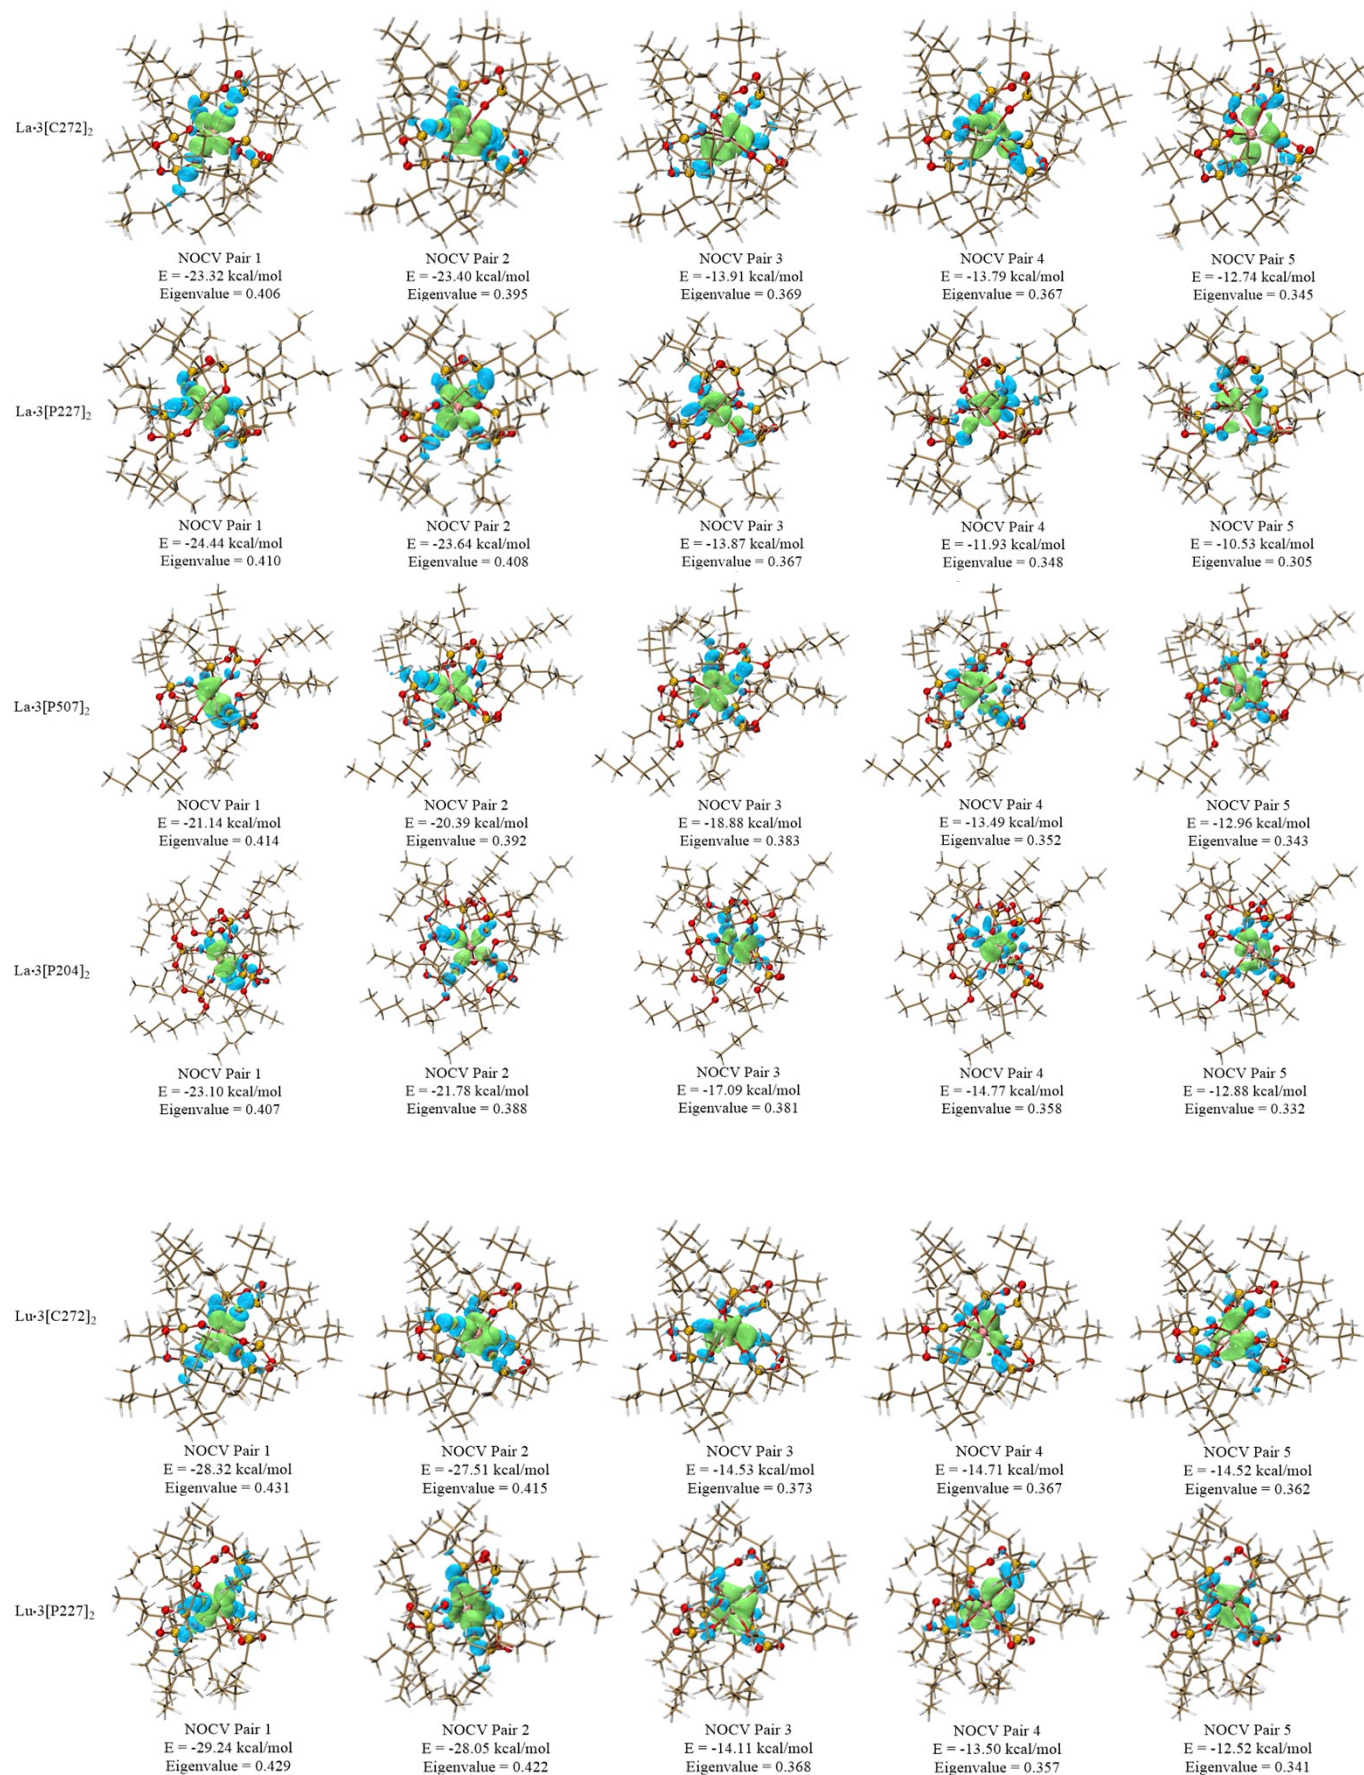

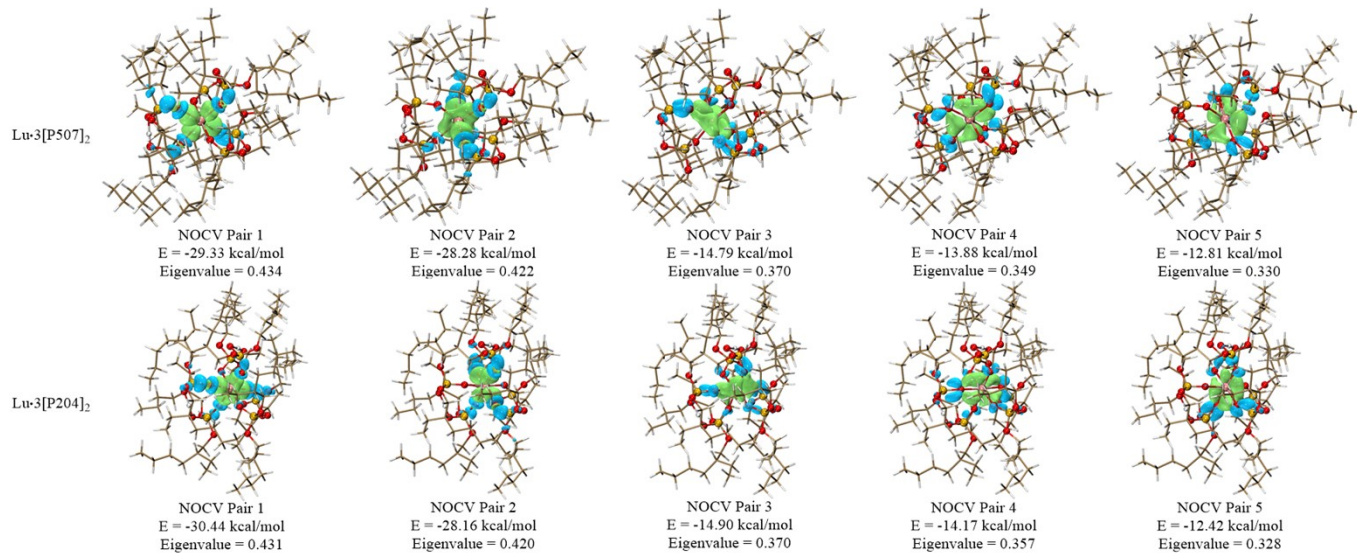

5. Table S1. The bond length and Mayer bond order (MBO) between Ln-O in four extractant complexes at the level of BP86/ECP28MWB.

|                        |          | $L_{Ln-O} / \text{\AA}$ |                   |                   |                   |                   |                   |                   |                     |
|------------------------|----------|-------------------------|-------------------|-------------------|-------------------|-------------------|-------------------|-------------------|---------------------|
|                        |          |                         | La-O <sub>1</sub> | La-O <sub>2</sub> | La-O <sub>3</sub> | La-O <sub>4</sub> | La-O <sub>5</sub> | La-O <sub>6</sub> | La-O <sub>ave</sub> |
| La·3(HA <sub>2</sub> ) | A = C272 | Bond length             | 2.437             | 2.343             | 2.421             | 2.327             | 2.375             | 2.428             | 2.389               |
|                        |          | MBO                     | 0.412             | 0.529             | 0.433             | 0.478             | 0.425             | 0.486             | 0.461               |
|                        | A = P227 | Bond length             | 2.418             | 2.425             | 2.411             | 2.401             | 2.404             | 2.369             | 2.405               |
|                        |          | MBO                     | 0.509             | 0.423             | 0.462             | 0.455             | 0.487             | 0.430             | 0.461               |
|                        | A = P507 | Bond length             | 2.390             | 2.514             | 2.422             | 2.424             | 2.428             | 2.365             | 2.424               |
|                        |          | MBO                     | 0.535             | 0.387             | 0.428             | 0.533             | 0.500             | 0.452             | 0.473               |
|                        | A = P204 | Bond length             | 2.390             | 2.395             | 2.366             | 2.491             | 2.590             | 2.495             | 2.455               |
|                        |          | MBO                     | 0.522             | 0.422             | 0.524             | 0.423             | 0.430             | 0.521             | 0.474               |
|                        |          |                         | Lu-O <sub>1</sub> | Lu-O <sub>2</sub> | Lu-O <sub>3</sub> | Lu-O <sub>4</sub> | Lu-O <sub>5</sub> | Lu-O <sub>6</sub> | Lu-O <sub>ave</sub> |
| Lu·3(HA <sub>2</sub> ) | A = C272 | Bond length             | 2.213             | 2.154             | 2.187             | 2.232             | 2.191             | 2.193             | 2.195               |
|                        |          | MBO                     | 0.476             | 0.585             | 0.558             | 0.462             | 0.484             | 0.530             | 0.516               |
|                        | A = P227 | Bond length             | 2.235             | 2.174             | 2.208             | 2.189             | 2.176             | 2.200             | 2.197               |
|                        |          | MBO                     | 0.481             | 0.554             | 0.488             | 0.556             | 0.559             | 0.492             | 0.522               |
|                        | A = P507 | Bond length             | 2.164             | 2.222             | 2.175             | 2.236             | 2.152             | 2.249             | 2.200               |
|                        |          | MBO                     | 0.573             | 0.476             | 0.509             | 0.531             | 0.573             | 0.476             | 0.523               |
|                        | A = P204 | Bond length             | 2.161             | 2.176             | 2.169             | 2.261             | 2.163             | 2.161             | 2.182               |
|                        |          | MBO                     | 0.558             | 0.486             | 0.519             | 0.539             | 0.561             | 0.451             | 0.519               |



6. Table S2. Topological properties of the complex structures between La/Lu and six coordination oxygen atoms, including density of all electrons  $\rho(\mathbf{r})$ , Laplacian of electron density  $\nabla^2\rho(\mathbf{r})$ .

|                         |                              | La-O <sub>1</sub> | La-O <sub>2</sub> | La-O <sub>3</sub> | La-O <sub>4</sub> | La-O <sub>5</sub> | La-O <sub>6</sub> | Average |
|-------------------------|------------------------------|-------------------|-------------------|-------------------|-------------------|-------------------|-------------------|---------|
| La·3[C272] <sub>2</sub> | $\rho(\mathbf{r}_n)$         | 0.0514            | 0.0633            | 0.0541            | 0.0651            | 0.0582            | 0.0554            | 0.0579  |
|                         | $\nabla^2\rho(\mathbf{r}_n)$ | 0.202             | 0.250             | 0.206             | 0.259             | 0.235             | 0.197             | 0.225   |
| La·3[P227] <sub>2</sub> | $\rho(\mathbf{r}_n)$         | 0.0562            | 0.0526            | 0.0605            | 0.0573            | 0.0584            | 0.0577            | 0.0571  |
|                         | $\nabla^2\rho(\mathbf{r}_n)$ | 0.204             | 0.207             | 0.232             | 0.212             | 0.205             | 0.214             | 0.212   |
| La·3[P507] <sub>2</sub> | $\rho(\mathbf{r}_n)$         | 0.0587            | 0.0430            | 0.0603            | 0.0537            | 0.0552            | 0.0533            | 0.0540  |
|                         | $\nabla^2\rho(\mathbf{r}_n)$ | 0.215             | 0.164             | 0.235             | 0.202             | 0.200             | 0.205             | 0.204   |
| La·3[P204] <sub>2</sub> | $\rho(\mathbf{r}_n)$         | 0.0629            | 0.0542            | 0.0545            | 0.0591            | 0.0571            | 0.0600            | 0.0580  |
|                         | $\nabla^2\rho(\mathbf{r}_n)$ | 0.232             | 0.215             | 0.201             | 0.237             | 0.221             | 0.211             | 0.220   |
|                         |                              | Lu-O <sub>1</sub> | Lu-O <sub>2</sub> | Lu-O <sub>3</sub> | Lu-O <sub>4</sub> | Lu-O <sub>5</sub> | Lu-O <sub>6</sub> | Average |
| Lu·3[C272] <sub>2</sub> | $\rho(\mathbf{r}_n)$         | 0.0650            | 0.0752            | 0.0698            | 0.0674            | 0.0684            | 0.0652            | 0.0685  |
|                         | $\nabla^2\rho(\mathbf{r}_n)$ | 0.312             | 0.372             | 0.329             | 0.333             | 0.340             | 0.295             | 0.330   |
| Lu·3[P227] <sub>2</sub> | $\rho(\mathbf{r}_n)$         | 0.0619            | 0.0721            | 0.0665            | 0.0709            | 0.0732            | 0.0680            | 0.0688  |
|                         | $\nabla^2\rho(\mathbf{r}_n)$ | 0.295             | 0.351             | 0.317             | 0.332             | 0.348             | 0.324             | 0.328   |
| Lu·3[P507] <sub>2</sub> | $\rho(\mathbf{r}_n)$         | 0.0742            | 0.0693            | 0.0734            | 0.0686            | 0.0758            | 0.0605            | 0.0703  |
|                         | $\nabla^2\rho(\mathbf{r}_n)$ | 0.348             | 0.345             | 0.351             | 0.334             | 0.360             | 0.283             | 0.337   |
| Lu·3[P204] <sub>2</sub> | $\rho(\mathbf{r}_n)$         | 0.0747            | 0.0717            | 0.0751            | 0.0747            | 0.0730            | 0.0576            | 0.0711  |
|                         | $\nabla^2\rho(\mathbf{r}_n)$ | 0.360             | 0.349             | 0.362             | 0.365             | 0.340             | 0.261             | 0.340   |

7. Table S3. The values of ESP nearby three types atoms of simplified structures.

|                         |                         | O <sub>1</sub> | O <sub>2</sub> | O <sub>3</sub> | O <sub>4</sub> | O <sub>5</sub> | O <sub>6</sub> | Average |
|-------------------------|-------------------------|----------------|----------------|----------------|----------------|----------------|----------------|---------|
| La·3[C272] <sub>2</sub> | Coordination oxygen     | 43.36          | 43.36          | 40.64          | 35.57          | 39.76          | 43.36          | 41.01   |
|                         | phosphorus atom         | 38.85          | 34.88          | 35.53          | 33.87          | 41.50          | 27.72          | 35.39   |
|                         | Hydrogen bonding oxygen | -18.26         | -25.52         | -17.63         | -26.42         | -16.58         | -21.90         | -21.05  |
| La·3[P227] <sub>2</sub> | Coordination oxygen     | 31.79          | 27.06          | 31.79          | 26.37          | 31.79          | 27.09          | 29.32   |
|                         | phosphorus atom         | 21.59          | 23.60          | 32.23          | 27.65          | 31.59          | 32.80          | 28.24   |
|                         | Hydrogen bonding oxygen | -23.73         | -18.86         | -17.89         | -23.15         | -19.99         | -15.25         | -19.81  |
| La·3[P507] <sub>2</sub> | Coordination oxygen     | 60.13          | 63.89          | 62.64          | 63.68          | 58.90          | 63.60          | 62.14   |
|                         | phosphorus atom         | 27.22          | 41.69          | 39.99          | 56.43          | 34.75          | 32.42          | 38.75   |
|                         | Hydrogen bonding oxygen | -24.47         | -20.30         | -14.52         | -22.06         | -23.39         | -16.97         | -20.29  |
| La·3[P204] <sub>2</sub> | Coordination oxygen     | 55.49          | 63.09          | 59.24          | 64.18          | 73.58          | 67.33          | 63.82   |
|                         | phosphorus atom         | 27.01          | 45.78          | 38.27          | 57.72          | 40.89          | 42.22          | 41.98   |
|                         | Hydrogen bonding oxygen | -25.70         | -17.42         | -14.77         | -26.83         | -16.86         | -21.43         | -20.50  |
| Lu·3[C272] <sub>2</sub> | Coordination oxygen     | 28.74          | 29.34          | 26.65          | 40.96          | 34.30          | 19.41          | 29.90   |
|                         | phosphorus atom         | 36.71          | 28.28          | 26.79          | 42.20          | 43.92          | 25.07          | 33.83   |
|                         | Hydrogen bonding oxygen | -17.79         | -24.30         | -23.01         | -17.11         | -16.22         | -20.73         | -19.86  |
| Lu·3[P227] <sub>2</sub> | Coordination oxygen     | 24.94          | 29.74          | 27.56          | 22.69          | 19.26          | 24.66          | 24.81   |
|                         | phosphorus atom         | 31.98          | 22.68          | 33.99          | 27.18          | 26.46          | 31.77          | 29.01   |
|                         | Hydrogen bonding oxygen | -16.52         | -26.41         | -16.21         | -23.88         | -22.59         | -18.06         | -20.61  |
| Lu·3[P507] <sub>2</sub> | Coordination oxygen     | 18.93          | 28.09          | 29.35          | 25.92          | 33.42          | 31.00          | 27.79   |
|                         | phosphorus atom         | 25.58          | 35.12          | 34.46          | 32.28          | 34.39          | 34.75          | 32.76   |
|                         | Hydrogen bonding oxygen | -22.85         | -17.38         | -17.86         | -22.67         | -23.22         | -13.23         | -19.54  |
| Lu·3[P204] <sub>2</sub> | Coordination oxygen     | 23.09          | 29.72          | 35.56          | 21.72          | 17.83          | 24.91          | 25.47   |
|                         | phosphorus atom         | 27.11          | 35.53          | 40.11          | 25.06          | 22.79          | 31.88          | 30.41   |
|                         | Hydrogen bonding oxygen | -23.80         | -16.76         | -16.50         | -22.18         | -25.27         | -15.23         | -19.96  |

8. Table S4. The Gibbs free energy of complexation structures between Ln (Ln = La/Lu) and four organophosphoric extractants in three forms ( $\text{Ln}^{3+}$ ,  $(\text{Ln}\cdot 8\text{H}_2\text{O})^{3+}$  and  $(\text{Ln}\cdot 9\text{H}_2\text{O})^{3+}$ ).

|          | $\Delta G_{\text{B3LYP}} / \text{kcal}\cdot\text{mol}^{-1}$ |                                             |                                             |                  |                                             |                                             |
|----------|-------------------------------------------------------------|---------------------------------------------|---------------------------------------------|------------------|---------------------------------------------|---------------------------------------------|
|          | $\text{La}^{3+}$                                            | $(\text{La}\cdot 8\text{H}_2\text{O})^{3+}$ | $(\text{La}\cdot 9\text{H}_2\text{O})^{3+}$ | $\text{Lu}^{3+}$ | $(\text{Lu}\cdot 8\text{H}_2\text{O})^{3+}$ | $(\text{Lu}\cdot 9\text{H}_2\text{O})^{3+}$ |
| A = C272 | -1.27                                                       | -36.12                                      | -8.83                                       | -112.26          | -49.53                                      | -31.99                                      |
| A = P227 | -20.86                                                      | -55.72                                      | -28.43                                      | -143.28          | -80.45                                      | -62.92                                      |
| A = P507 | -29.79                                                      | -65.64                                      | -37.35                                      | -143.14          | -80.31                                      | -62.78                                      |
| A = P204 | -56.23                                                      | -91.09                                      | -63.80                                      | -178.51          | -115.68                                     | -98.15                                      |
|          | $\Delta G_{\text{BP86}} / \text{kcal}\cdot\text{mol}^{-1}$  |                                             |                                             |                  |                                             |                                             |
|          | $\text{La}^{3+}$                                            | $(\text{La}\cdot 8\text{H}_2\text{O})^{3+}$ | $(\text{La}\cdot 9\text{H}_2\text{O})^{3+}$ | $\text{Lu}^{3+}$ | $(\text{Lu}\cdot 8\text{H}_2\text{O})^{3+}$ | $(\text{Lu}\cdot 9\text{H}_2\text{O})^{3+}$ |
| A = C272 | -22.31                                                      | -54.79                                      | -30.18                                      | -134.21          | -68.96                                      | -52.78                                      |
| A = P227 | -36.57                                                      | -69.05                                      | -44.44                                      | -160.57          | -95.31                                      | -79.14                                      |
| A = P507 | -56.25                                                      | -88.73                                      | -64.13                                      | -168.46          | -103.20                                     | -87.03                                      |
| A = P204 | -73.87                                                      | -106.35                                     | -81.75                                      | -192.74          | -127.48                                     | -111.30                                     |

9. Table S5. The contribution of various types of shells of complexes structures.

| Contribution of various types of shells to NOCV pair/orbitals |                         |                  |                         |                  |                         |                  |                         |                  |
|---------------------------------------------------------------|-------------------------|------------------|-------------------------|------------------|-------------------------|------------------|-------------------------|------------------|
|                                                               | La·3(C272) <sub>2</sub> |                  | La·3(P227) <sub>2</sub> |                  | La·3(P507) <sub>2</sub> |                  | La·3(P204) <sub>2</sub> |                  |
|                                                               | type                    | Contribution (%) |
| pair 1                                                        | s                       | 17.49            | s                       | 16.17            | s                       | 18.99            | s                       | 12.29            |
|                                                               | p                       | 34.49            | p                       | 38.01            | p                       | 35.48            | p                       | 32.75            |
|                                                               | d                       | 47.04            | d                       | 45.44            | d                       | 42.46            | d                       | 51.50            |
|                                                               | f                       | 0.87             | f                       | 0.30             | f                       | 2.95             | f                       | 3.20             |
| pair 2                                                        | s                       | 11.88            | s                       | 15.30            | s                       | 20.07            | s                       | 16.30            |
|                                                               | p                       | 32.83            | p                       | 35.03            | p                       | 33.48            | p                       | 28.96            |
|                                                               | d                       | 53.26            | d                       | 48.64            | d                       | 43.85            | d                       | 50.34            |
|                                                               | f                       | 1.87             | f                       | 0.92             | f                       | 2.51             | f                       | 4.20             |
| pair 3                                                        | s                       | 20.37            | s                       | 32.57            | s                       | 18.80            | s                       | 17.65            |
|                                                               | p                       | 40.36            | p                       | 33.26            | p                       | 32.56            | p                       | 35.48            |
|                                                               | d                       | 38.03            | d                       | 32.42            | d                       | 46.90            | d                       | 45.79            |
|                                                               | f                       | 1.18             | f                       | 1.69             | f                       | 1.44             | f                       | 1.01             |
| pair 4                                                        | s                       | 22.39            | s                       | 14.89            | s                       | 18.17            | s                       | 16.88            |
|                                                               | p                       | 37.41            | p                       | 39.17            | p                       | 35.06            | p                       | 32.99            |
|                                                               | d                       | 38.78            | d                       | 44.75            | d                       | 45.57            | d                       | 48.88            |
|                                                               | f                       | 1.39             | f                       | 1.15             | f                       | 1.11             | f                       | 0.98             |
| pair 5                                                        | s                       | 20.50            | s                       | 28.06            | s                       | 16.91            | s                       | 22.59            |
|                                                               | p                       | 36.57            | p                       | 38.53            | p                       | 38.18            | p                       | 33.17            |
|                                                               | d                       | 41.42            | d                       | 29.04            | d                       | 43.16            | d                       | 43.05            |
|                                                               | f                       | 1.40             | f                       | 4.26             | f                       | 1.59             | f                       | 0.94             |

| Contribution of various types of shells to NOCV pair/orbitals |                         |                  |                         |                  |                         |                  |                         |                  |
|---------------------------------------------------------------|-------------------------|------------------|-------------------------|------------------|-------------------------|------------------|-------------------------|------------------|
|                                                               | Lu·3(C272) <sub>2</sub> |                  | Lu·3(P227) <sub>2</sub> |                  | Lu·3(P507) <sub>2</sub> |                  | Lu·3(P204) <sub>2</sub> |                  |
|                                                               | type                    | Contribution (%) |
| pair 1                                                        | s                       | 13.30            | s                       | 12.51            | s                       | 10.97            | s                       | 9.19             |
|                                                               | p                       | 29.96            | p                       | 27.50            | p                       | 30.11            | p                       | 25.34            |
|                                                               | d                       | 56.30            | d                       | 59.59            | d                       | 58.51            | d                       | 65.03            |
|                                                               | f                       | 0.15             | f                       | 0.02             | f                       | 0.17             | f                       | 0.02             |
| pair 2                                                        | s                       | 10.11            | s                       | 11.89            | s                       | 11.38            | s                       | 11.20            |
|                                                               | p                       | 26.95            | p                       | 28.75            | p                       | 27.53            | p                       | 26.26            |
|                                                               | d                       | 62.38            | d                       | 58.94            | d                       | 60.50            | d                       | 61.98            |
|                                                               | f                       | 0.13             | f                       | 0.06             | f                       | 0.23             | f                       | 0.17             |
|                                                               | s                       | 22.79            | s                       | 18.92            | s                       | 17.97            | s                       | 20.53            |

|        |   |       |   |       |   |       |   |       |
|--------|---|-------|---|-------|---|-------|---|-------|
| pair 3 | p | 45.83 | p | 44.61 | p | 43.90 | p | 41.12 |
|        | d | 31.29 | d | 36.44 | d | 37.99 | d | 38.28 |
|        | f | 0.06  | f | 0.01  | f | 0.10  | f | 0.04  |
|        |   |       |   |       |   |       |   |       |
| pair 4 | s | 20.02 | s | 19.25 | s | 17.38 | s | 25.31 |
|        | p | 44.30 | p | 44.36 | p | 40.82 | p | 36.96 |
|        | d | 35.56 | d | 36.33 | d | 41.71 | d | 37.69 |
|        | f | 0.09  | f | 0.02  | f | 0.05  | f | 0.01  |
|        |   |       |   |       |   |       |   |       |
| pair 5 | s | 25.62 | s | 23.55 | s | 18.25 | s | 20.13 |
|        | p | 40.20 | p | 41.10 | p | 45.86 | p | 41.00 |
|        | d | 34.08 | d | 35.32 | d | 35.71 | d | 38.80 |
|        | f | 0.06  | f | 0.01  | f | 0.14  | f | 0.03  |

10. Table S6. The atoms contribution of complexes structures.

| La·3(C272) <sub>2</sub> |                 |             |                 |             |                 |             |                 |             |                 |             |
|-------------------------|-----------------|-------------|-----------------|-------------|-----------------|-------------|-----------------|-------------|-----------------|-------------|
|                         | pair 1 / -22.32 |             | pair 2 / -23.40 |             | pair 3 / -13.91 |             | pair 4 / -13.79 |             | pair 5 / -12.74 |             |
|                         | No.             | Percent (%) |
| La                      |                 | 49.67       |                 | 55.07       |                 | 42.21       |                 | 45.92       |                 | 46.33       |
| Phosphorus atoms        | 1               | 0.38        | 1               | 1.85        | 1               | 2.52        | 1               | 3.11        | 1               | 0.15        |
|                         | 2               | 5.24        | 2               | 0.34        | 2               | 8.31        | 2               | 1.34        | 2               | 4.97        |
|                         | 3               | 1.95        | 3               | 0.27        | 3               | 0.94        | 3               | 0.80        | 3               | 3.11        |
|                         | 4               | 2.14        | 4               | 2.10        | 4               | 0.51        | 4               | 1.99        | 4               | 2.05        |
|                         | 5               | 0.16        | 5               | 4.10        | 5               | 5.07        | 5               | 2.80        | 5               | 0.81        |
|                         | 6               | 0.93        | 6               | 1.13        | 6               | 1.16        | 6               | 4.25        | 6               | 2.32        |
|                         |                 |             |                 |             |                 |             |                 |             |                 |             |
| Ln coordinate oxygen    | 1               | 0.79        | 1               | 4.03        | 1               | 2.24        | 1               | 3.40        | 1               | 0.16        |
|                         | 2               | 8.30        | 2               | 0.93        | 2               | 6.19        | 2               | 2.24        | 2               | 4.90        |
|                         | 3               | 3.37        | 3               | 0.38        | 3               | 1.82        | 3               | 0.26        | 3               | 4.65        |
|                         | 4               | 4.53        | 4               | 2.99        | 4               | 0.61        | 4               | 4.28        | 4               | 3.01        |
|                         | 5               | 0.31        | 5               | 7.21        | 5               | 5.86        | 5               | 4.17        | 5               | 0.98        |
|                         | 6               | 1.46        | 6               | 2.54        | 6               | 1.33        | 6               | 4.23        | 6               | 4.50        |
|                         |                 |             |                 |             |                 |             |                 |             |                 |             |
| hydrogen bonding oxygen | 1               | 0.01        | 1               | 0.03        | 1               | 0.25        | 1               | 0.14        | 1               | 0.01        |
|                         | 2               | 0.21        | 2               | 0.07        | 2               | 1.16        | 2               | 0.14        | 2               | 0.17        |
|                         | 3               | 0.10        | 3               | 0.02        | 3               | 0.14        | 3               | 0.02        | 3               | 0.34        |
|                         | 4               | 0.09        | 4               | 0.15        | 4               | 0.03        | 4               | 0.15        | 4               | 0.39        |
|                         | 5               | 0.06        | 5               | 0.45        | 5               | 0.14        | 5               | 0.56        | 5               | 0.09        |
|                         | 6               | 0.08        | 6               | 0.02        | 6               | 0.12        | 6               | 0.32        | 6               | 0.11        |

| La·3(P227) <sub>2</sub> |                 |             |                 |             |                 |             |                 |             |                 |             |
|-------------------------|-----------------|-------------|-----------------|-------------|-----------------|-------------|-----------------|-------------|-----------------|-------------|
|                         | pair 1 / -24.44 |             | pair 2 / -23.64 |             | pair 3 / -13.87 |             | pair 4 / -11.93 |             | pair 5 / -10.53 |             |
|                         | No.             | Percent (%) |

|                         |   |       |   |       |   |       |   |       |   |       |
|-------------------------|---|-------|---|-------|---|-------|---|-------|---|-------|
| La                      |   | 47.42 |   | 50.69 |   | 53.37 |   | 46.99 |   | 41.65 |
| Phosphorus atoms        | 1 | 6.61  | 1 | 1.34  | 1 | 4.67  | 1 | 3.36  | 1 | 5.95  |
|                         | 2 | 0.28  | 2 | 2.42  | 2 | 0.24  | 2 | 2.33  | 2 | 1.08  |
|                         | 3 | 1.75  | 3 | 4.21  | 3 | 0.54  | 3 | 2.59  | 3 | 2.48  |
|                         | 4 | 2.60  | 4 | 3.08  | 4 | 2.94  | 4 | 0.46  | 4 | 6.39  |
|                         | 5 | 1.31  | 5 | 2.44  | 5 | 2.87  | 5 | 1.04  | 5 | 2.18  |
|                         | 6 | 2.81  | 6 | 0.30  | 6 | 1.91  | 6 | 6.44  | 6 | 0.23  |
|                         |   |       |   |       |   |       |   |       |   |       |
| Ln coordinate oxygen    | 1 | 5.35  | 1 | 1.42  | 1 | 4.19  | 1 | 1.85  | 1 | 2.22  |
|                         | 2 | 0.26  | 2 | 3.70  | 2 | 0.55  | 2 | 3.55  | 2 | 1.86  |
|                         | 3 | 0.31  | 3 | 7.05  | 3 | 0.65  | 3 | 4.37  | 3 | 2.62  |
|                         | 4 | 2.85  | 4 | 2.31  | 4 | 4.00  | 4 | 0.18  | 4 | 3.92  |
|                         | 5 | 3.02  | 5 | 3.01  | 5 | 4.73  | 5 | 1.15  | 5 | 3.24  |
|                         | 6 | 4.80  | 6 | 0.31  | 6 | 1.28  | 6 | 7.27  | 6 | 0.82  |
|                         |   |       |   |       |   |       |   |       |   |       |
| hydrogen bonding oxygen | 1 | 0.11  | 1 | 0.08  | 1 | 0.38  | 1 | 0.05  | 1 | 0.32  |
|                         | 2 | 0.05  | 2 | 0.10  | 2 | 0.01  | 2 | 0.23  | 2 | 0.17  |
|                         | 3 | 0.09  | 3 | 0.32  | 3 | 0.03  | 3 | 0.07  | 3 | 0.15  |
|                         | 4 | 0.16  | 4 | 0.12  | 4 | 0.07  | 4 | 0.04  | 4 | 0.45  |
|                         | 5 | 0.04  | 5 | 0.08  | 5 | 0.30  | 5 | 0.24  | 5 | 0.27  |
|                         | 6 | 0.09  | 6 | 0.01  | 6 | 0.15  | 6 | 0.37  | 6 | 0.07  |

| La <sub>3</sub> (P507) <sub>2</sub> |                 |             |                 |             |                 |             |                 |             |                 |             |
|-------------------------------------|-----------------|-------------|-----------------|-------------|-----------------|-------------|-----------------|-------------|-----------------|-------------|
|                                     | pair 1 / -21.14 |             | pair 2 / -20.39 |             | pair 3 / -18.88 |             | pair 4 / -13.49 |             | pair 5 / -12.96 |             |
|                                     | No.             | Percent (%) |
| La                                  |                 | 52.20       |                 | 50.63       |                 | 53.46       |                 | 49.76       |                 | 48.11       |
| Phosphorus                          | 1               | 1.21        | 1               | 5.60        | 1               | 1.41        | 1               | 3.33        | 1               | 0.45        |
|                                     | 2               | 0.50        | 2               | 1.31        | 2               | 1.80        | 2               | 0.62        | 2               | 0.72        |
|                                     | 3               | 0.57        | 3               | 2.04        | 3               | 4.15        | 3               | 0.82        | 3               | 1.76        |

|                         |   |       |   |      |   |      |   |      |   |      |
|-------------------------|---|-------|---|------|---|------|---|------|---|------|
|                         | 4 | 0.67  | 4 | 0.93 | 4 | 2.20 | 4 | 1.95 | 4 | 3.82 |
|                         | 5 | 1.63  | 5 | 1.62 | 5 | 1.26 | 5 | 2.73 | 5 | 2.97 |
|                         | 6 | 6.93  | 6 | 1.64 | 6 | 0.30 | 6 | 1.77 | 6 | 2.55 |
|                         |   |       |   |      |   |      |   |      |   |      |
| Ln coordinate oxygen    | 1 | 1.22  | 1 | 9.95 | 1 | 1.25 | 1 | 5.11 | 1 | 1.06 |
|                         | 2 | 0.27  | 2 | 2.54 | 2 | 1.57 | 2 | 1.59 | 2 | 1.39 |
|                         | 3 | 1.38  | 3 | 2.36 | 3 | 5.58 | 3 | 1.16 | 3 | 2.53 |
|                         | 4 | 0.77  | 4 | 0.77 | 4 | 5.01 | 4 | 3.12 | 4 | 4.85 |
|                         | 5 | 3.01  | 5 | 1.31 | 5 | 2.13 | 5 | 4.99 | 5 | 4.72 |
|                         | 6 | 12.32 | 6 | 0.31 | 6 | 1.07 | 6 | 1.96 | 6 | 2.95 |
|                         |   |       |   |      |   |      |   |      |   |      |
| hydrogen bonding oxygen | 1 | 0.30  | 1 | 0.14 | 1 | 0.15 | 1 | 0.03 | 1 | 0.23 |
|                         | 2 | 0.01  | 2 | 0.14 | 2 | 0.02 | 2 | 0.00 | 2 | 0.30 |
|                         | 3 | 0.02  | 3 | 0.09 | 3 | 0.12 | 3 | 0.07 | 3 | 0.57 |
|                         | 4 | 0.03  | 4 | 0.03 | 4 | 0.12 | 4 | 0.05 | 4 | 0.44 |
|                         | 5 | 0.19  | 5 | 0.18 | 5 | 0.24 | 5 | 0.19 | 5 | 0.11 |
|                         | 6 | 0.42  | 6 | 0.03 | 6 | 0.07 | 6 | 0.13 | 6 | 0.67 |
|                         |   |       |   |      |   |      |   |      |   |      |
| methyl oxygen           | 1 | 0.10  | 1 | 0.27 | 1 | 0.07 | 1 | 0.61 | 1 | 0.02 |
|                         | 2 | 0.05  | 2 | 0.43 | 2 | 0.21 | 2 | 0.08 | 2 | 0.03 |
|                         | 3 | 0.19  | 3 | 0.41 | 3 | 0.26 | 3 | 0.16 | 3 | 0.08 |
|                         | 4 | 0.03  | 4 | 0.01 | 4 | 0.04 | 4 | 0.17 | 4 | 0.21 |
|                         | 5 | 0.32  | 5 | 0.10 | 5 | 0.07 | 5 | 0.54 | 5 | 0.23 |
|                         | 6 | 1.46  | 6 | 0.19 | 6 | 0.56 | 6 | 1.03 | 6 | 0.24 |

| La·3(204) <sub>2</sub> |                 |             |                 |             |                 |             |                 |             |                 |             |
|------------------------|-----------------|-------------|-----------------|-------------|-----------------|-------------|-----------------|-------------|-----------------|-------------|
|                        | pair 1 / -23.10 |             | pair 2 / -21.78 |             | pair 3 / -17.09 |             | pair 4 / -14.77 |             | pair 5 / -12.88 |             |
|                        | No.             | Percent (%) |
| La                     |                 | 58.10       |                 | 59.59       |                 | 51.40       |                 | 52.44       |                 | 48.78       |



|                         |   |      |   |      |   |      |   |      |   |      |
|-------------------------|---|------|---|------|---|------|---|------|---|------|
| Phosphorus atoms        | 1 | 0.46 | 1 | 3.51 | 1 | 2.86 | 1 | 2.68 | 1 | 1.03 |
|                         | 2 | 0.54 | 2 | 2.15 | 2 | 2.32 | 2 | 1.25 | 2 | 1.58 |
|                         | 3 | 2.08 | 3 | 1.07 | 3 | 2.81 | 3 | 0.68 | 3 | 3.39 |
|                         | 4 | 0.91 | 4 | 1.00 | 4 | 2.15 | 4 | 1.04 | 4 | 1.56 |
|                         | 5 | 6.28 | 5 | 2.55 | 5 | 0.68 | 5 | 0.77 | 5 | 2.37 |
|                         | 6 | 0.73 | 6 | 1.94 | 6 | 0.89 | 6 | 0.93 | 6 | 1.76 |
|                         |   |      |   |      |   |      |   |      |   |      |
| Ln coordinate oxygen    | 1 | 1.03 | 1 | 6.64 | 1 | 3.04 | 1 | 5.90 | 1 | 1.65 |
|                         | 2 | 0.72 | 2 | 4.80 | 2 | 3.58 | 2 | 1.85 | 2 | 2.68 |
|                         | 3 | 3.92 | 3 | 0.58 | 3 | 5.48 | 3 | 4.28 | 3 | 3.30 |
|                         | 4 | 2.00 | 4 | 2.38 | 4 | 1.90 | 4 | 2.88 | 4 | 2.61 |
|                         | 5 | 8.11 | 5 | 0.42 | 5 | 2.45 | 5 | 0.72 | 5 | 3.32 |
|                         | 6 | 2.69 | 6 | 2.84 | 6 | 1.66 | 6 | 2.15 | 6 | 2.24 |
|                         |   |      |   |      |   |      |   |      |   |      |
| hydrogen bonding oxygen | 1 | 0.11 | 1 | 0.30 | 1 | 0.50 | 1 | 0.08 | 1 | 0.25 |
|                         | 2 | 0.05 | 2 | 0.18 | 2 | 0.03 | 2 | 0.10 | 2 | 0.59 |
|                         | 3 | 0.19 | 3 | 0.05 | 3 | 0.14 | 3 | 0.03 | 3 | 0.68 |
|                         | 4 | 0.02 | 4 | 0.02 | 4 | 0.10 | 4 | 0.08 | 4 | 0.54 |
|                         | 5 | 0.72 | 5 | 0.04 | 5 | 0.21 | 5 | 0.03 | 5 | 0.32 |
|                         | 6 | 0.13 | 6 | 0.04 | 6 | 0.28 | 6 | 0.04 | 6 | 0.15 |
|                         |   |      |   |      |   |      |   |      |   |      |
| methyl oxygen           | 1 | 0.01 | 1 | 1.00 | 1 | 0.36 | 1 | 0.18 | 1 | 0.09 |
|                         | 2 | 0.05 | 2 | 0.21 | 2 | 0.09 | 2 | 0.82 | 2 | 0.02 |
|                         | 3 | 0.06 | 3 | 0.79 | 3 | 0.36 | 3 | 0.01 | 3 | 0.03 |
|                         | 4 | 0.02 | 4 | 0.02 | 4 | 0.09 | 4 | 0.35 | 4 | 0.05 |
|                         | 5 | 0.28 | 5 | 0.10 | 5 | 0.35 | 5 | 0.47 | 5 | 0.20 |
|                         | 6 | 0.27 | 6 | 0.02 | 6 | 0.47 | 6 | 0.14 | 6 | 0.13 |
|                         | 7 | 0.01 | 7 | 0.31 | 7 | 0.31 | 7 | 0.31 | 7 | 0.06 |
|                         | 8 | 0.47 | 8 | 0.24 | 8 | 0.07 | 8 | 0.26 | 8 | 0.08 |

|  |    |      |    |      |    |      |    |      |    |      |
|--|----|------|----|------|----|------|----|------|----|------|
|  | 9  | 0.45 | 9  | 0.18 | 9  | 1.29 | 9  | 1.47 | 9  | 0.03 |
|  | 10 | 0.34 | 10 | 0.02 | 10 | 0.04 | 10 | 0.07 | 10 | 0.25 |
|  | 11 | 0.17 | 11 | 0.38 | 11 | 0.02 | 11 | 0.22 | 11 | 0.08 |
|  | 12 | 0.02 | 12 | 0.04 | 12 | 0.16 | 12 | 0.08 | 12 | 0.27 |

| Lu <sub>3</sub> (C272) <sub>2</sub> |                 |             |                 |             |                 |             |                 |             |                 |             |
|-------------------------------------|-----------------|-------------|-----------------|-------------|-----------------|-------------|-----------------|-------------|-----------------|-------------|
|                                     | pair 1 / -28.32 |             | pair 2 / -27.51 |             | pair 3 / -14.53 |             | pair 4 / -14.71 |             | pair 5 / -14.52 |             |
|                                     | No.             | Percent (%) |
| Lu                                  |                 | 56.81       |                 | 62.64       |                 | 33.91       |                 | 36.09       |                 | 39.14       |
| Phosphorus atoms                    | 1               | 0.31        | 1               | 1.55        | 1               | 4.40        | 1               | 4.08        | 1               | 3.23        |
|                                     | 2               | 2.85        | 2               | 0.38        | 2               | 5.98        | 2               | 5.97        | 2               | 6.99        |
|                                     | 3               | 1.83        | 3               | 0.55        | 3               | 1.27        | 3               | 1.89        | 3               | 3.42        |
|                                     | 4               | 1.93        | 4               | 1.03        | 4               | 1.17        | 4               | 3.45        | 4               | 1.61        |
|                                     | 5               | 1.60        | 5               | 1.10        | 5               | 4.18        | 5               | 4.99        | 5               | 3.67        |
|                                     | 6               | 0.21        | 6               | 1.38        | 6               | 6.51        | 6               | 1.97        | 6               | 3.16        |
|                                     |                 |             |                 |             |                 |             |                 |             |                 |             |
| Ln coordinate oxygen                | 1               | 0.54        | 1               | 5.62        | 1               | 3.26        | 1               | 1.53        | 1               | 1.61        |
|                                     | 2               | 5.87        | 2               | 1.40        | 2               | 3.63        | 2               | 5.05        | 2               | 4.09        |
|                                     | 3               | 4.04        | 3               | 0.61        | 3               | 1.51        | 3               | 1.62        | 3               | 2.44        |
|                                     | 4               | 4.33        | 4               | 2.21        | 4               | 1.74        | 4               | 2.62        | 4               | 2.06        |
|                                     | 5               | 3.07        | 5               | 3.44        | 5               | 2.49        | 5               | 4.37        | 5               | 2.68        |
|                                     | 6               | 0.19        | 6               | 5.28        | 6               | 3.94        | 6               | 1.66        | 6               | 2.25        |
|                                     |                 |             |                 |             |                 |             |                 |             |                 |             |
| hydrogen bonding oxygen             | 1               | 0.01        | 1               | 0.06        | 1               | 0.50        | 1               | 0.06        | 1               | 0.04        |
|                                     | 2               | 0.15        | 2               | 0.02        | 2               | 0.78        | 2               | 0.33        | 2               | 0.54        |
|                                     | 3               | 0.20        | 3               | 0.03        | 3               | 0.17        | 3               | 0.18        | 3               | 0.09        |
|                                     | 4               | 0.11        | 4               | 0.08        | 4               | 0.04        | 4               | 0.48        | 4               | 0.13        |
|                                     | 5               | 0.09        | 5               | 0.04        | 5               | 0.58        | 5               | 0.70        | 5               | 0.15        |

|  |   |      |   |      |   |      |   |      |   |      |
|--|---|------|---|------|---|------|---|------|---|------|
|  | 6 | 0.03 | 6 | 0.13 | 6 | 0.18 | 6 | 0.24 | 6 | 0.31 |
|--|---|------|---|------|---|------|---|------|---|------|

| Lu <sub>3</sub> (P <sub>227</sub> ) <sub>2</sub> |                 |             |                 |             |                 |             |                 |             |                 |             |
|--------------------------------------------------|-----------------|-------------|-----------------|-------------|-----------------|-------------|-----------------|-------------|-----------------|-------------|
|                                                  | pair 1 / -29.24 |             | pair 2 / -28.05 |             | pair 3 / -14.11 |             | pair 4 / -13.50 |             | pair 5 / -12.52 |             |
|                                                  | No.             | Percent (%) |
| Lu                                               |                 | 59.50       |                 | 59.36       |                 | 36.78       |                 | 36.63       |                 | 35.49       |
| Phosphorus atoms                                 | 1               | 1.33        | 1               | 1.07        | 1               | 2.71        | 1               | 3.51        | 1               | 5.89        |
|                                                  | 2               | 1.03        | 2               | 0.78        | 2               | 4.53        | 2               | 7.77        | 2               | 2.40        |
|                                                  | 3               | 0.27        | 3               | 1.26        | 3               | 3.07        | 3               | 0.93        | 3               | 4.76        |
|                                                  | 4               | 2.20        | 4               | 0.85        | 4               | 2.66        | 4               | 3.05        | 4               | 2.79        |
|                                                  | 5               | 1.62        | 5               | 0.75        | 5               | 3.15        | 5               | 5.67        | 5               | 2.14        |
|                                                  | 6               | 0.09        | 6               | 2.66        | 6               | 5.70        | 6               | 2.39        | 6               | 4.89        |
|                                                  |                 |             |                 |             |                 |             |                 |             |                 |             |
| Ln coordinate oxygen                             | 1               | 4.28        | 1               | 1.32        | 1               | 1.98        | 1               | 1.20        | 1               | 3.06        |
|                                                  | 2               | 4.48        | 2               | 1.14        | 2               | 3.47        | 2               | 5.38        | 2               | 2.25        |
|                                                  | 3               | 0.12        | 3               | 5.42        | 3               | 3.24        | 3               | 0.72        | 3               | 3.24        |
|                                                  | 4               | 4.19        | 4               | 2.77        | 4               | 2.00        | 4               | 2.44        | 4               | 3.69        |
|                                                  | 5               | 4.65        | 5               | 1.68        | 5               | 2.76        | 5               | 5.83        | 5               | 1.61        |
|                                                  | 6               | 0.31        | 6               | 5.98        | 6               | 4.18        | 6               | 0.99        | 6               | 2.93        |
|                                                  |                 |             |                 |             |                 |             |                 |             |                 |             |
| hydrogen bonding oxygen                          | 1               | 0.02        | 1               | 0.02        | 1               | 0.39        | 1               | 0.16        | 1               | 0.22        |
|                                                  | 2               | 0.06        | 2               | 0.05        | 2               | 0.28        | 2               | 1.18        | 2               | 0.18        |
|                                                  | 3               | 0.01        | 3               | 0.04        | 3               | 0.11        | 3               | 0.06        | 3               | 0.67        |
|                                                  | 4               | 0.07        | 4               | 0.04        | 4               | 0.11        | 4               | 0.04        | 4               | 0.65        |
|                                                  | 5               | 0.04        | 5               | 0.03        | 5               | 0.40        | 5               | 0.49        | 5               | 0.17        |
|                                                  | 6               | 0.03        | 6               | 0.10        | 6               | 0.19        | 6               | 0.25        | 6               | 0.43        |
